# Supplementary material for: High-Throughput Label-free Single-Cell Proteomics Enabled by Multicolumn NanoLC with a 5-min Cycle Time
Source: Research Square preprint supplement (doi:10.21203/rs.3.rs-8042176/v1), 2025-11-18
Supplement: Supplementary file 1 [file 956cf3dae9df60129bedbe58.docx]

Log in to the PRIDE website using the following details:

**Project accession:** PXD070201

**Token:** ABx0Apx7KN0G

Alternatively, reviewers can access the dataset by logging in to the PRIDE website using the following account details:

Username: reviewer_pxd070201@ebi.ac.uk

Password: jPcKoKjNFM0p
