# Supplementary material for: High-Throughput Label-free Single-Cell Proteomics Enabled by Multicolumn NanoLC with a 5-min Cycle Time
Source: Research Square preprint supplement (doi:10.21203/rs.3.rs-8042176/v1), 2025-11-18
Supplement: Supplementary file 2 [file 9d227aaaa730c46e7e4e2490.docx]

**Supplementary Information**

**High-Throughput Label-free Single-Cell Proteomics Enabled by 5-min Multicolumn NanoLC-MS Platform**

Chao Wang a#, Hsien-Jung L. Lin a#, Siqi Huang a, Garrett D. Haynie a, Kenneth S. Triggs a, YenJou Chang a, David V. Hansen a, Thy Truong b, Xiaofeng Xie b and Ryan T. Kelly a*

a Department of Chemistry and Biochemistry, Brigham Young University, Provo, Utah 84602, United States;

b MicrOmics Technologies, LLC, Spanish Fork, Utah 84660, United States

# These authors contribute equally for this manuscript

*Email: ryan.kelly@byu.edu


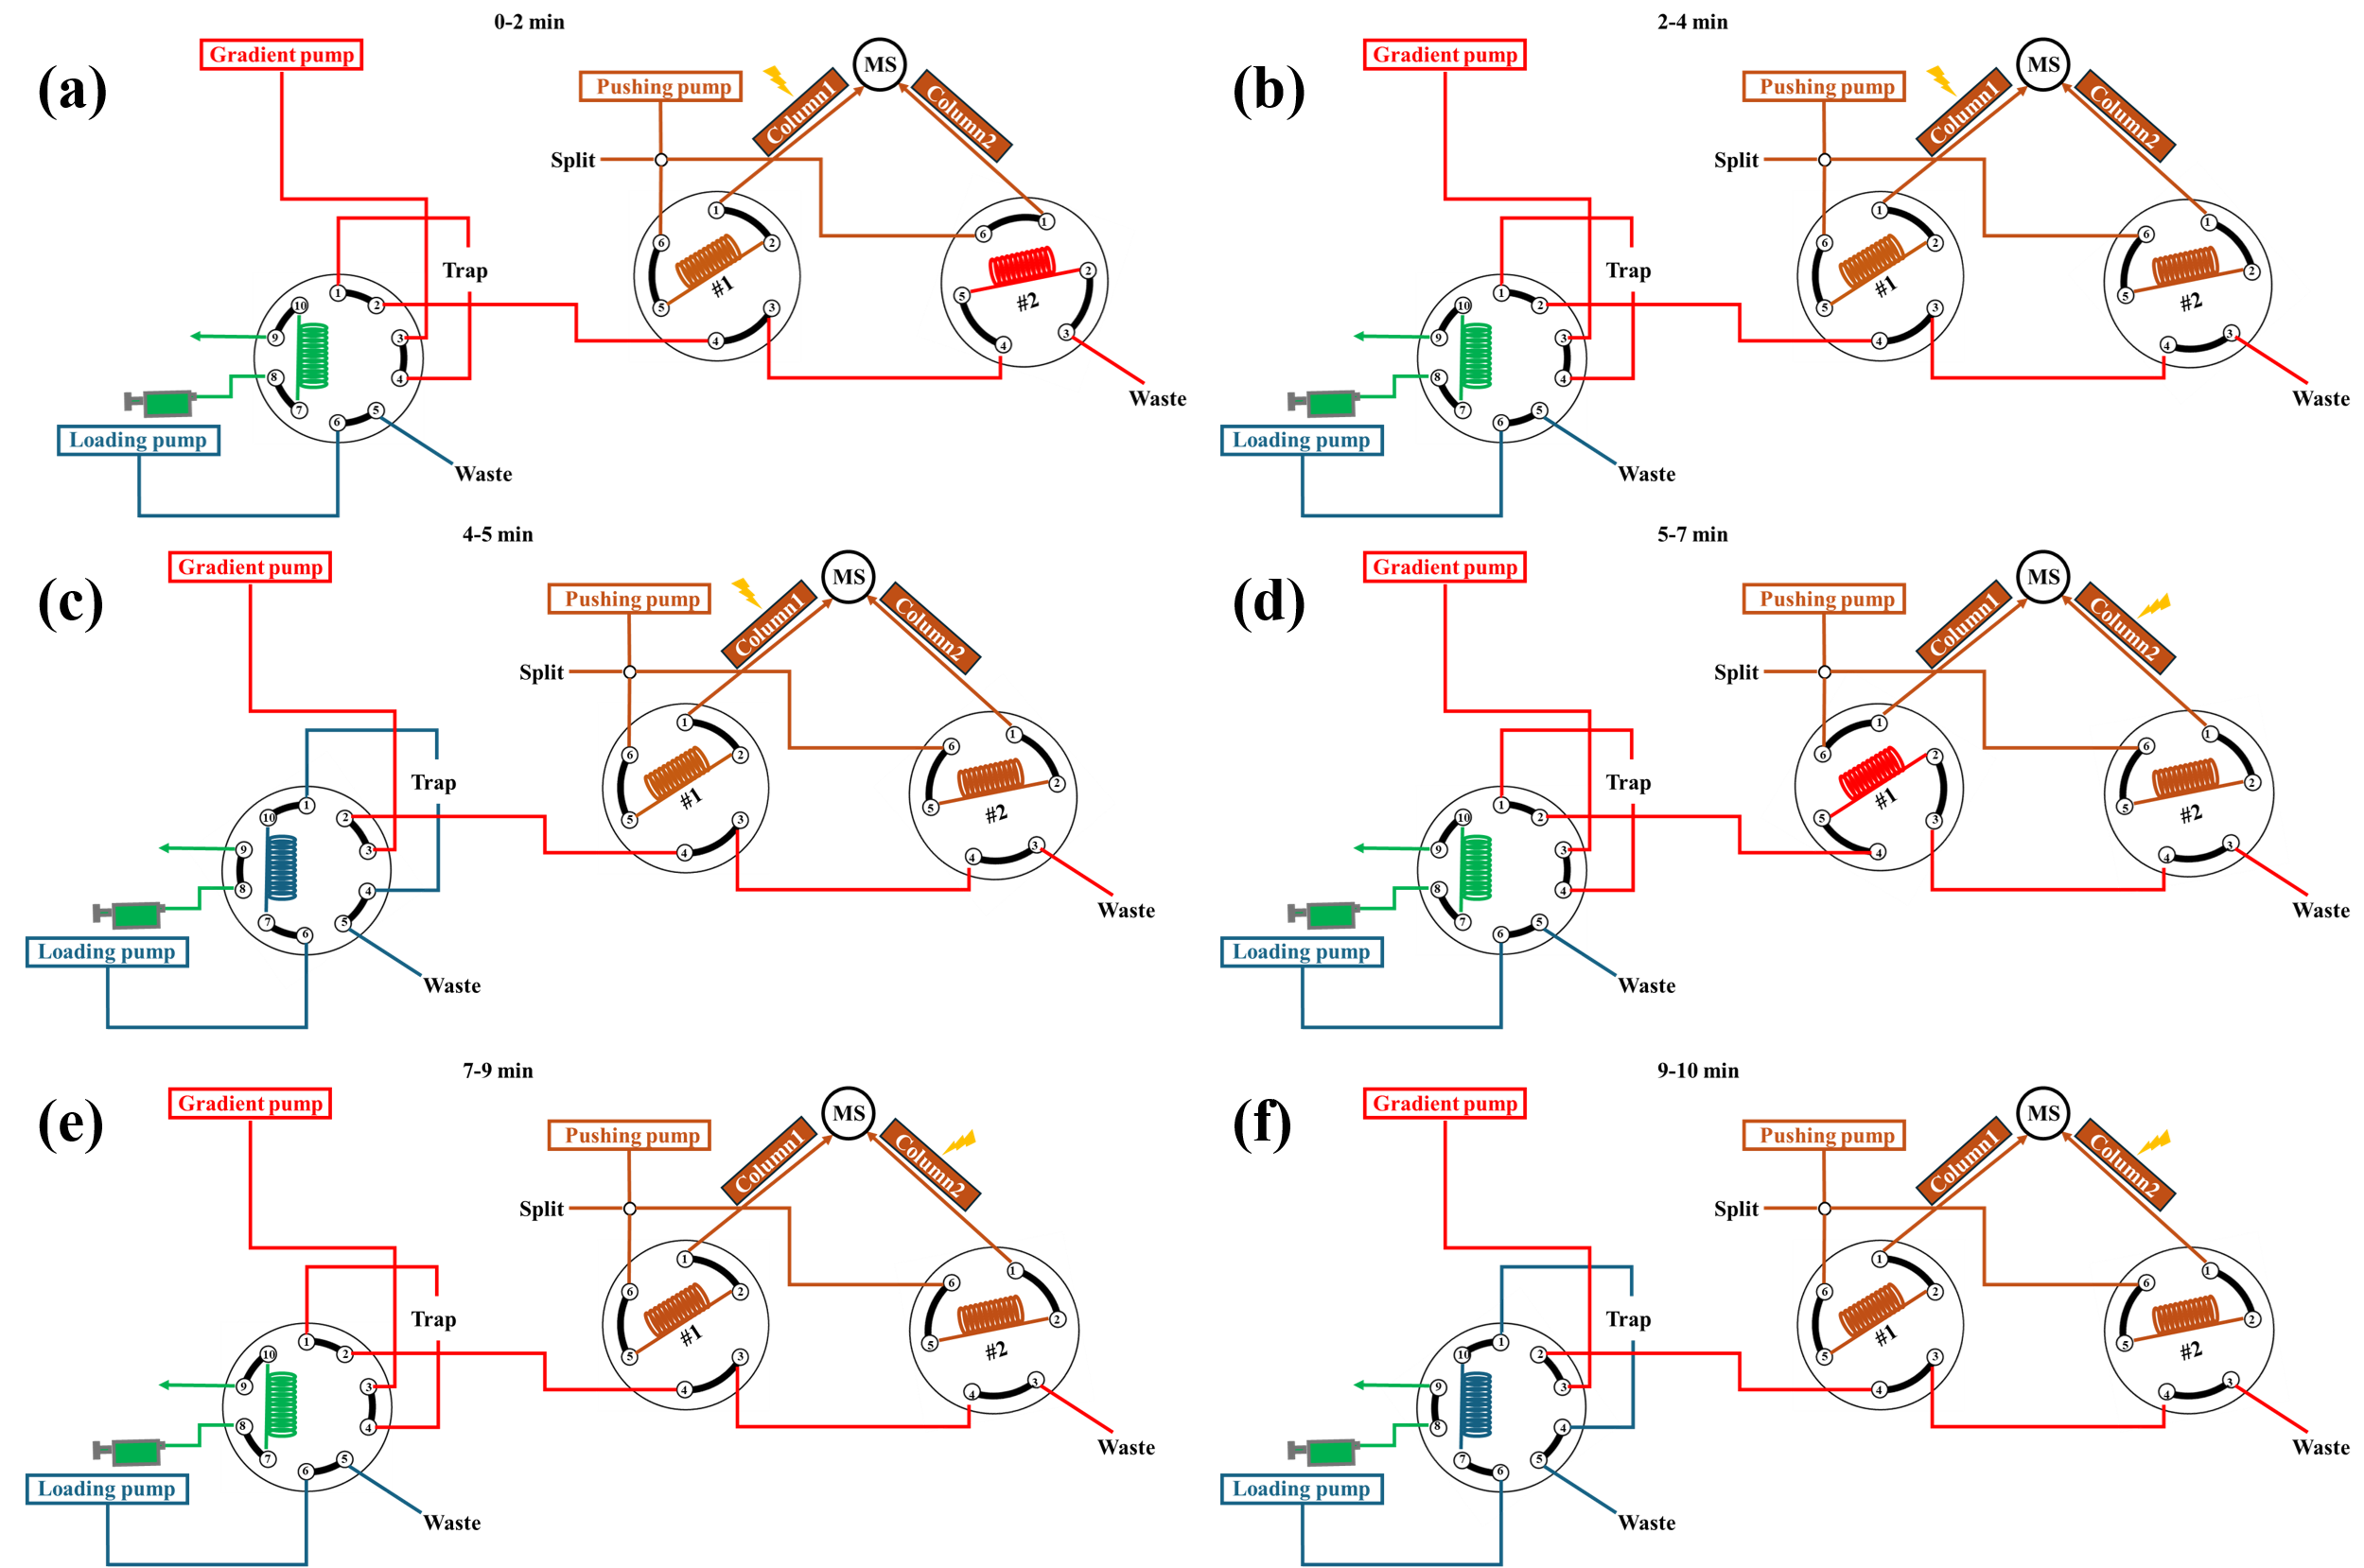


Fig. S1 Minute-by-minute schematic diagrams of the multicolumn LC system.


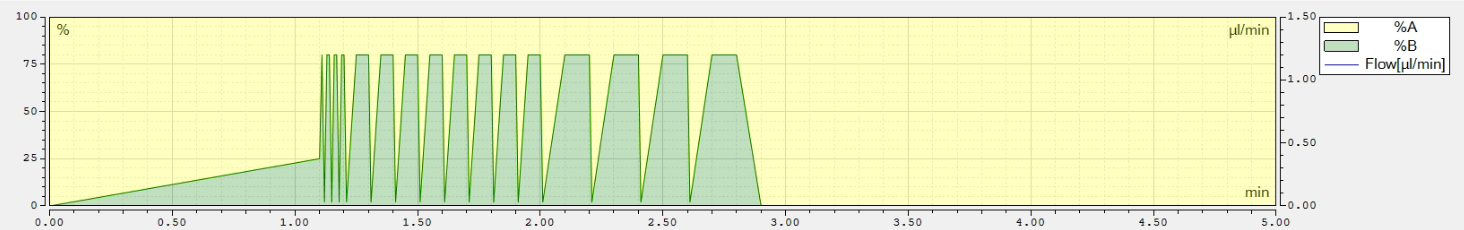


Figure S2 Illustration of the gradient curve used for trap column cleanup.

| **m/z** | **sample** | **blank1** | **blank2** | **blank3** |
| --- | --- | --- | --- | --- |
| **444.74** | 100% | 0.38% | 0.67% | 0.22% |
| **425.77** | 100% | 0.28% | 0.86% | 0.21% |
| **495.30** | 100% | 0.40% | 0.58% | 0.43% |

Table S1 Relative Intensity for three peptides extracted from 2 ng HeLa digests runs and three blank runs
